# Supplementary material
Source: Research Square preprint supplement (doi:10.21203/rs.3.rs-9614982/v1)
Supplement: Supplementary file 1 [file 1f4f1807a0bd1d034ef5a93f.docx]

# APPENDIX

## Appendix A: Summary of used data

## **Appendix B:** **Forestplot**

## **Appendix C:**  Graphs
